# Supplementary material for: Utilization of Integrated Community Case Management and Its Factors in Southern Ethiopia: Facility Based-Cross-Sectional Study
Source: Hindawi journal article supplement (doi:10.1155/2021/8835804), 2021-05-31
Supplement: f1 [file 8835804.f1.docx]

**English Version Interview Guide** the study of “*Utilization of Integrated Community Case Management and its factors in Southern Ethiopia: facility based cross sectional study*”

**Information sheet and consent form**

Dear Respondent:

Good morning/after-noon!. My name is ____________. I am from Hossana College of Health sciences research team.  Currently, I am working with the community to contribute and support implementation of community health activities. Now, I am going to collect information about Utilization of integrated community case management service and related factors in this area. You are randomly chosen to be included in the study as part of the sample population to complete the questionnaire designed by the researcher. The information obtained in this study will be used only for research purposes. The data you will provide is very helpful to achieve the intended objectives of the study. Any information obtained will be kept strictly confidential and will not be exposed to any other body. Involvement in this study is optional and is only in voluntary basis and you can drop any individual question or the whole questionnaire. But your participation and contribution in the study is very important to come up with important findings which may help local health planners to intervene the problem locally. The questionnaire probably takes between 30-40 minutes to complete.

Do you have any opinion regarding this study?

Do you agree to participate in this study?

Yes, continue No, thank you!

# Annex 1. Questionnaire, English version

Are you ok to participate in the study? Signature _________________________

| Identification |
| --- |
| Woreda**:______________**Kebele:_______________Gote______________Health post_______________  Name of data collector _____________________________________ sig.___________ date _________  Name of Supervisor _______________________________________ sig. ____________ date ________  Date of interview (dd/mm/yyyy)|____|____||____|____| Time at beginning of interview _____:______ |

**SECTION-I SOCIO-DEMOGRAPHIC CHARACTERISTICS OF THE RESPONDENTS**

| **S.N** | **Questions** | **Response and Coding** | **Skip** |
| --- | --- | --- | --- |
| **101** | Age of the respondent in years | ____________years |  |
| **102** | Sex of the care giver | 1. Male 2. Female |  |
| **103** | Current marital status | 1. Married 2. Single 3. Divorced 4. Widowed 5. Separated |  |
| **104** | Religion | 1. Orthodox 2. Protestant 3. Muslim 4. Catholic 5. Others (specify)____________ |  |
| **105** | Ethnicity | 1. Hadiya 2. Kembata 3. Guragie 4. Siltie 5. Amhara 6. Others (specify)____________ |  |
| **106** | The highest grade completed by the respondent | 1. Illiterate 2. Able to read and write 3. Elementary (1 - 6) 4. Junior (7 - 8) 5. Secondary (9 - 12) 6. Tertiary (12+) |  |
| **107** | Occupation of the respondent | 1. Employee (GO/NGO) 2. House wife 3. Merchant 4. Student 5. Farmer 6. Daily worker 7. Others (Specify)_________ |  |
| **108** | Occupation of the husband if any | 1. Farmer 2. Employee (GO/NGO) 3. Merchant 4. Student 5. Daily worker 6. Others (Specify)_________ |  |
| **109** | Education of the husband if any | 1. Illiterate 2. Able to read and write 3. Elementary (1 - 6) 4. Junior (7 - 8) 5. Secondary (9 - 12) 6. Tertiary (12+) |  |
| **110** | Family average monthly income  (salary, farming, trade, rental etc | __________ in ETB |  |
| **111** | Parity of the respondent | _________ births |  |
| **112** | Family size | ______________ |  |
| **113** | Age of the child | __________ in months |  |
| **114** | Sex of the child | 1. Male 2. Female |  |

**Section II: Health Service Related Factors**

| **S.N** | **Questions** | **Response and Coding** | **Skip** |
| --- | --- | --- | --- |
| 201 | What is the current problem of the child? (more than one answer is possible) | 1. Fever 2. Diarrhea 3. Cough 4. Signs of malnutrition 5. Others ________________________ |  |
| 202 | Time of onset of the child’s illness (time of health seeking after onset of the illness) | 1. 1st day 2. 2nd day 3. 3rd day 4. 4th day 5. 5th day 6. After 5th day |  |
| 203 | Have you visited the closest health post for current health problem of the child? | 1. Yes 2. No |  |
| 204 | If no for question no 203 (if you did not take your child to health post in your kebele) what was your reason?  (Probe before deciding among the choices, more than one response is possible) (for current and previous conditions) | 1. Health post closed 2. Absence of drugs 3. The health extension workers are not compassionate, respectful and caring 4. The health extension workers are not coming for work timely 5. The health extension workers usually miss the work 6. Lack of skills by HEW 7. Do not know the existence of the health post in the kebele 8. Others_________________________ |  |
| 205 | If yes for question no 203 why have you come here again today? | 1. Drugs unavailable 2. Referral 3. Health post closed 4. The condition became the same or worse 5. Others_________________________ |  |
| 206 | How long does it take to reach to the health post? | ____________ minutes on foot |  |
| 207 | Was there any family member who was sick in the last two weeks? | 1. Yes 2. No |  |
| 208 | Did you or your family seek any medical help in the last two weeks for any other conditions (EPI, FP, ANC, follow up etc)? | 1. Yes 2. No |  |
| 209 | If yes for question no 208, where did you go? | 1. Health post 2. Health center 3. Hospital 4. Private clinic 5. Others______________ |  |
| 210 | If you went to one of the above mentioned health facilities, have you been informed about ICCM service? | 1. Yes 2. No |  |
| 211 | If yes for question no 210, what have you been informed about? | 1. Fever 2. Diarrhea 3. Cough 4. Others ________________________ |  |
| 212 | Have you been visited by health extension workers in the last month? | 1. Yes 2. No |  |
| 213 | If yes for question no 212, how many times in the last month? | ____________ times per month |  |

**Section III Individual Factors**

| **S.N** | **Questions** | **Response and Coding** | **Skip** |
| --- | --- | --- | --- |
| 301 | Have you ever heard about ICCM ? | 1. Yes 2. No |  |
| 302 | If yes for question no 301, from where did you get the information? | 1. HDA or 1 to 5 2. Health extension workers 3. Other health professionals 4. Mass media 5. Others_____________________________ |  |
| 303 | If yes for q301, have you been informed about ICCM services availability at the health post? | 1. Yes 2. No |  |
| 304 | If yes for q303, what ICCM services do you know? | 1. EPI 2. HIV testing and counseling 3. Deworming 4. Vit A 5. Nutritional assessment 6. The current illness 7. Do not know |  |
| 305 | Do you think that ICCM services benefit you? | 1. Yes 2. No 3. I do not know |  |
| 306 | If yes for question no 305, what is its benefits? (probe) | 1. For child’s growth 2. Reduce child’s mortality |  |
| 307 | Are you a member of 1 to 5 network (HDA)? | 1. Yes 2. No |  |
| 308 | Have you been served by any health extension workers before? | 1. Yes 2. No |  |
| 309 | If yes for q308, how do you rate their way of service provision? | 1. Respectful 2. Compassionate 3. Relatively good 4. Non-respectful 5. Bad |  |
| 310 | Do you accept the service provided by health extension workers? | 1. Yes 2. No |  |
| 311 | If no for question no 310, why? | 1. Poor service delivery 2. Not role model 3. Lack of health information dissemination activities 4. Lack of drugs 5. Others_____________________________ |  |
